# Supplementary material for: Synthesis of tetraphenylethylene pillar[6]arenes and the selective fast quenching of their AIE fluorescence by TNT
Source: Royal Society of Chemistry journal article supplement (doi:10.1039/c4cc05189k), 2014-07-30
Supplement: c4cc05189k1.pdf [file c4cc05189k1.pdf]

## Supplementary Information

### Synthesis of Tetraphenylethylene Pillar[4]arenes and the Selective Fast Quenching of Their AIE Fluorescence by TNT

Jin-Hua Wang, Hai-Tao Feng and Yan-Song Zheng\*

Key Laboratory for Large-Format Battery Materials and System, Ministry of Education, School of Chemistry and Chemical Engineering, Huazhong University of Science and Technology, Wuhan 430074, China. [zyansong@hotmail.com](mailto:zyansong@hotmail.com).

#### Table of Contents

|                                                                                       |           |
|---------------------------------------------------------------------------------------|-----------|
| <b>Materials and Methods</b> .....                                                    | <b>02</b> |
| <b>Synthesis of TPE pillar[6]arenes</b> .....                                         |           |
| <b>Fig. S1.</b> <sup>1</sup> H NMR spectrum of <b>3a</b> in CDCl <sub>3</sub> .....   | <b>05</b> |
| <b>Fig. S2.</b> <sup>13</sup> C NMR spectrum of <b>3a</b> in CDCl <sub>3</sub> .....  | <b>06</b> |
| <b>Fig. S3.</b> IR spectrum of <b>3a</b> .....                                        | <b>06</b> |
| <b>Fig. S4.</b> Mass spectrum of <b>3a</b> .....                                      | <b>07</b> |
| <b>Fig. S5.</b> <sup>1</sup> H NMR spectrum of <b>3b</b> in CDCl <sub>3</sub> .....   | <b>07</b> |
| <b>Fig. S6.</b> <sup>13</sup> C NMR spectrum of <b>3b</b> in CDCl <sub>3</sub> .....  | <b>08</b> |
| <b>Fig. S7.</b> IR spectrum of <b>3b</b> .....                                        | <b>08</b> |
| <b>Fig. S8.</b> Mass spectrum of <b>3b</b> .....                                      | <b>09</b> |
| <b>Fig. S9.</b> <sup>1</sup> H NMR spectrum of <b>3c</b> in CDCl <sub>3</sub> .....   | <b>09</b> |
| <b>Fig. S10.</b> <sup>13</sup> C NMR spectrum of <b>3c</b> in CDCl <sub>3</sub> ..... | <b>10</b> |
| <b>Fig. S11.</b> IR spectrum of <b>3c</b> .....                                       | <b>10</b> |
| <b>Fig. S12.</b> Mass spectrum of <b>3c</b> .....                                     | <b>11</b> |
| <b>Fig. S13.</b> <sup>1</sup> H NMR spectrum of <b>4</b> in CDCl <sub>3</sub> .....   | <b>11</b> |
| <b>Fig. S14.</b> <sup>13</sup> C NMR spectrum of <b>4</b> in CDCl <sub>3</sub> .....  | <b>12</b> |
| <b>Fig. S15.</b> IR spectrum of <b>4</b> .....                                        | <b>12</b> |
| <b>Fig. S16.</b> Mass spectrum of <b>4</b> .....                                      | <b>13</b> |
| <b>Fig. S17.</b> Change of the fluorescence spectrum of <b>3a</b> with water.....     | <b>13</b> |
| <b>Fig. S18.</b> Change of the fluorescence spectrum of <b>3b</b> with water.....     | <b>14</b> |
| <b>Fig. S19.</b> Change of the fluorescence spectrum of <b>3c</b> with water.....     | <b>14</b> |
| <b>Fig. S20.</b> Change of the fluorescence spectrum of <b>4</b> with water.....      | <b>15</b> |
| <b>Fig. S21.</b> Partial short contacts between molecules of <b>4</b> .....           | <b>15</b> |

**Materials and methods:** All reagents and solvents were chemical pure (CP) grade or analytical reagent (AR) grade and were used as received unless otherwise specified.  $^1\text{H}$  NMR and  $^{13}\text{C}$  NMR spectra were measured on a Bruker AV 400 spectrometer at 298 K in  $\text{CDCl}_3$ . Infrared spectra were recorded on BRUKER EQUINAX55 spectrometer. Mass spectrum was measured on an IonSpec 4.7 Tesla FTMS instrument. Fluorescent emission spectra were collected on a Shimadzu RF-5301 fluorophotometer at 298 K.

### Synthesis of TPE pillar[6]arenes

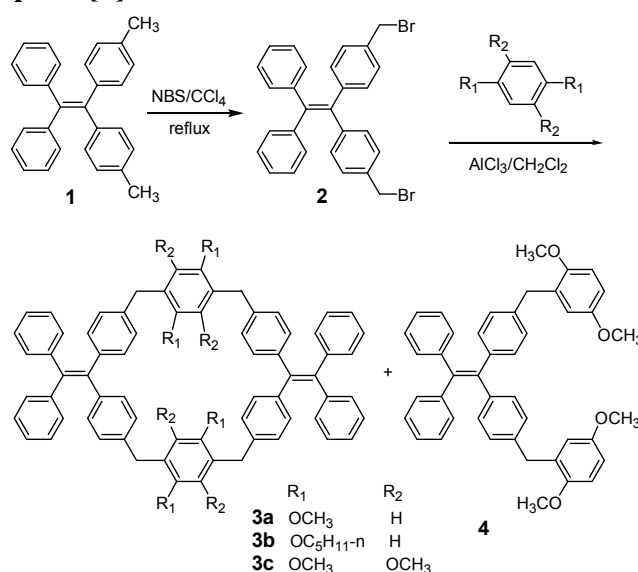

**Synthesis of the key intermediate 2:** It was synthesized according to the known procedure (A. Qin, L. Tang, J. W. Y. Lam, C. K. W. Jim, Y. Yu, H. Zhao, J. Sun and B. Z. Tang, *Adv. Funct. Mater.* 2009, **19**, 1891–1900). To a flask was added 4,4'-dimethyltetraphenylethene **1** (1.08 g, 3 mmol), 1-bromosuccinimide (NBS, 1.18 g, 3.3 mmol), dibenzoyl peroxide (15 mg, 0.060 mmol) and  $\text{CCl}_4$  (20 mL). The mixture was refluxed for 12 h, and then dichloromethane (20 mL) was added. After the solution was washed with water and brine, respectively, for three times, it was dried over anhydrous sodium sulfate, filtered and evaporated under vacuum to dryness. The residue was purified by flash chromatography (eluant, petroleum/dichloromethane 5:1 v/v) to give **2** as a slightly yellow powder (1.15 g, 74%). Mp 219.7–220.8 °C;  $^1\text{H}$  NMR (400 MHz,  $\text{CDCl}_3$ ) 7.11 (m, 10 H), 7.00 (dt,  $J = 6.0, 2.3$  Hz, 4 H), 6.97 (d,  $J =$

8.3 Hz, 4 H), 4.41 (s, 4 H);  $^{13}\text{C}$  NMR(100 MHz,  $\text{CDCl}_3$ ) 143.7, 143.3, 142.1, 139.5, 135.9, 131.7, 131.2, 128.5, 127.8, 126.7, 33.5; IR (KBr)  $\nu$  3070, 3026, 1659, 1604, 1507, 1488, 1440, 1410, 1226, 1205, 1129, 1099, 1072, 1024, 981, 839, 760, 697, 616  $\text{cm}^{-1}$ .

**Synthesis of TPE pillar[6]arene 3a:** To a flask was added **2** (1.20 g, 2.30 mmol), 1,4-dimethyloxybenzene (0.38 g, 2.80 mmol), anhydrous  $\text{AlCl}_3$  (370 mg, 2.80 mmol) and dichloromethane (210 mL). The mixture was stirred at ambient temperature for 6 h, and the resultant dark green solution was quenched with water (30 mL) and became yellow. After the yellow solution was washed with 50 mL water for three times, it was dried over anhydrous sodium sulfate, filtered and evaporated under vacuum to dryness. The remained slurry-like solid was purified by flash chromatography (eluant, petroleum/dichloromethane 2:1 v/v). The obtained solid was recrystallized from a mixed solvent of  $\text{CHCl}_3$  and methanol to give **3a** as a white solid (230 mg, 20%). Mp  $>300$   $^\circ\text{C}$ ;  $^1\text{H}$  NMR (400 MHz,  $\text{CDCl}_3$ )  $\delta$  7.11 – 7.08 (m, 12 H), 7.01 – 6.99 (m, 8 H), 6.87 (q,  $J = 12.4, 8.6$  Hz, 16 H), 6.60 (s, 4 H), 3.78 (s, 8 H), 3.66 (s, 12 H);  $^{13}\text{C}$  NMR (100 MHz,  $\text{CDCl}_3$ )  $\delta$  151.30, 144.29, 141.05, 140.95, 140.09, 139.37, 131.36, 131.23, 127.98, 127.79, 127.59, 126.09, 114.15, 55.15, 35.82; IR (KBr)  $\nu$  3076.93, 3048.41, 3022.06, 2989.82, 2930.59, 2902.72, 2829.42, 1601.12, 1571.49, 1505.34, 1460.78, 1437.26, 1403.28, 1334.40, 1293.88, 1250.50, 1214.75, 1179.21, 1108.72, 1073.01, 1047.17, 977.72, 952.91, 925.70, 869.49, 801.97, 760.89, 736.30, 699.32, 620.82, 594.09, 540.73, 511.38, 486.78, 461.60, 428.21  $\text{cm}^{-1}$ ; ESI $^+$  HRMS  $m/z$  calcd for  $\text{C}_{72}\text{H}_{60}\text{O}_4$  988.4492 [ $\text{M}^+$ ], found 988.4496 [ $\text{M}^+$ ].

**Synthesis of TPE pillar[6]arene 3b:** To a flask was added **2** (1.20 g, 2.30 mmol), 1,4-di(*n*-pentanoxy)benzene (0.70 g, 2.80 mmol), anhydrous  $\text{AlCl}_3$  (370 mg, 2.80 mmol) and dichloromethane (210 mL). The mixture was stirred at ambient temperature for 12 h, and the resultant dark brown solution was quenched with 30 mL water and it became yellow. After the yellow solution was washed with water (50 mL) for three times, it was dried with anhydrous sodium sulfate, filtered and evaporated to dryness under vacuum. The remained slurry-like solid was purified with flash chromatography (eluant, petroleum/dichloromethane 7:1 v/v). The obtained solid was

recrystallized from  $\text{CHCl}_3$  and methanol to give **3b** as a white solid (220 mg, 16%). Mp 270.8 – 271.4 °C;  $^1\text{H}$  NMR (400 MHz,  $\text{CDCl}_3$ )  $\delta$  7.09 (m, 12 H), 7.01 – 6.99 (m, 8 H), 6.85 (q,  $J = 13.2, 8.5$  Hz, 16 H), 5.57 (s, 4 H), 3.77 (s, 8 H), 3.75 (t,  $J = 6.7$  Hz, 8 H), 1.63 (m, 8 H), 1.33 – 1.29 (m, 16 H), 0.88 (t,  $J = 5.9$  Hz, 12 H);  $^{13}\text{C}$  NMR (100 MHz,  $\text{CDCl}_3$ )  $\delta$  150.6, 144.4, 141.2, 140.9, 139.9, 139.5, 131.4, 131.2, 128.0, 127.9, 127.6, 126.1, 114.9, 68.7, 36.1, 29.2, 28.2, 22.4, 14.0; IR (KBr)  $\nu$  3048.74, 3021.73, 2928.62, 1599.68, 1504.15, 1468.10, 1433.76, 1405.91, 1326.01, 1251.15, 1213.06, 1110.38, 1072.17, 1024.84, 929.95, 870.24, 800.84, 761.40, 699.97, 627.74  $\text{cm}^{-1}$ ; ESI<sup>+</sup> HRMS  $m/z$  calcd for  $\text{C}_{88}\text{H}_{93}\text{O}_4$  1213.7074  $[\text{M}+\text{H}]^+$ , found 1213.7022  $[\text{M}+\text{H}]^+$ .

**Synthesis of TPE pillar[6]arene 3c:** To a flask was added **2** (1.79 g, 3.46 mmol), 1,2,4,5-tetramethoxybenzene (0.82 g, 4.15 mmol), anhydrous  $\text{AlCl}_3$  (0.55 mg, 4.15 mmol) and dichloromethane (320 mL). The mixture was stirred at reflux for 3 days, and the resultant dark brown solution was quenched with 50 mL water and became yellow. After the yellow solution was washed with water (70 mL) for three times, it was dried with anhydrous sodium sulfate, filtered and evaporated to dryness under vacuum. The remained slurry-like solid was purified with flash chromatography (eluant, petroleum/dichloromethane 1:3 v/v). Then the solid was recrystallized from  $\text{CHCl}_3$  and methanol to give **3c** as a white solid (60 mg, 3.2%). Mp > 300 °C;  $^1\text{H}$  NMR (400 MHz,  $\text{CDCl}_3$ )  $\delta$  7.09 (m, 12 H), 6.99 – 6.97 (m, 16 H), 6.87 (d,  $J = 8.0$  Hz, 8 H), 3.80 (s, 8 H), 3.59 (s, 24 H);  $^{13}\text{C}$  NMR (100 MHz,  $\text{CDCl}_3$ )  $\delta$  147.4, 144.5, 141.0, 140.9, 140.5, 139.6, 131.4, 131.2, 128.3, 128.2, 127.6, 127.2, 126.1, 60.2, 30.0; IR (KBr)  $\nu$  3075, 3052, 3022, 2991, 2968, 2934, 2828, 1600, 1507, 1460, 1407, 1327, 1299, 1253, 1184, 1110, 1064, 1018, 978, 959, 920, 860, 836, 811, 790, 758, 734, 698, 660, 638, 618, 577, 514, 480, 461  $\text{cm}^{-1}$ ; ESI<sup>+</sup> HRMS  $m/z$  calcd for  $\text{C}_{76}\text{H}_{68}\text{KO}_8$  1147.4551  $[\text{M}+\text{K}]^+$ , found 1147.4528  $[\text{M}+\text{K}]^+$ .

**Synthesis of acyclic analogue 4:** To a flask was added **2** (1.20 g, 2.30 mmol), 1,4-dimethoxybenzene (1.92 g, 13.9 mmol), anhydrous  $\text{AlCl}_3$  (370 mg, 2.80 mmol) and dichloromethane (70 mL). The mixture was stirred at ambient temperature for 2 h, and the resultant dark brown solution was quenched with water (30 mL) and became yellow. After the yellow solution was washed with water (70 mL) for three times, it

was dried with anhydrous sodium sulfate, filtered and evaporated to dryness under vacuum. The remained slurry-like solid was purified with flash chromatography (eluant, petroleum/dichloromethane 1:2 v/v). Then the solid was recrystallized from CHCl<sub>3</sub> and methanol to give **4** as a white solid (710 mg, 48%). Mp 67.1 – 68.3 °C; <sup>1</sup>H NMR (400 MHz, CDCl<sub>3</sub>) δ 7.06 (m, 6 H), 7.02 – 7.00 (m, 4 H), 6.91 (s, 8 H), 6.76 (d, *J* = 8.8 Hz, 2 H), 6.69 (dt, *J* = 8.8, 2.8 Hz, 2 H), 6.54 (d, *J* = 2.8 Hz, 2H), 3.83 (s, 4 H), 3.71 (s, 12 H); <sup>13</sup>C NMR (100 MHz, CDCl<sub>3</sub>) δ 153.5, 151.7, 144.0, 141.3, 140.9, 140.2, 138.7, 131.3, 131.2, 131.1, 128.3, 127.5, 126.1, 116.6, 111.5, 111.2, 56.1, 55.6, 35.6; IR (KBr) ν 3021, 2993, 2953, 2901, 2830, 1598, 1498, 1464, 1436, 1412, 1314, 1297, 1275, 1219, 1178, 1155, 1108, 1076, 1046, 1025, 978, 949, 914, 852, 801, 756, 730, 700, 673, 636, 592, 578, 546, 486, 451 cm<sup>-1</sup>; ESI<sup>+</sup> HRMS *m/z* calcd for C<sub>44</sub>H<sub>40</sub>KO<sub>4</sub> 671.2564 [M+K]<sup>+</sup>, found 671.2550 [M+K]<sup>+</sup>.

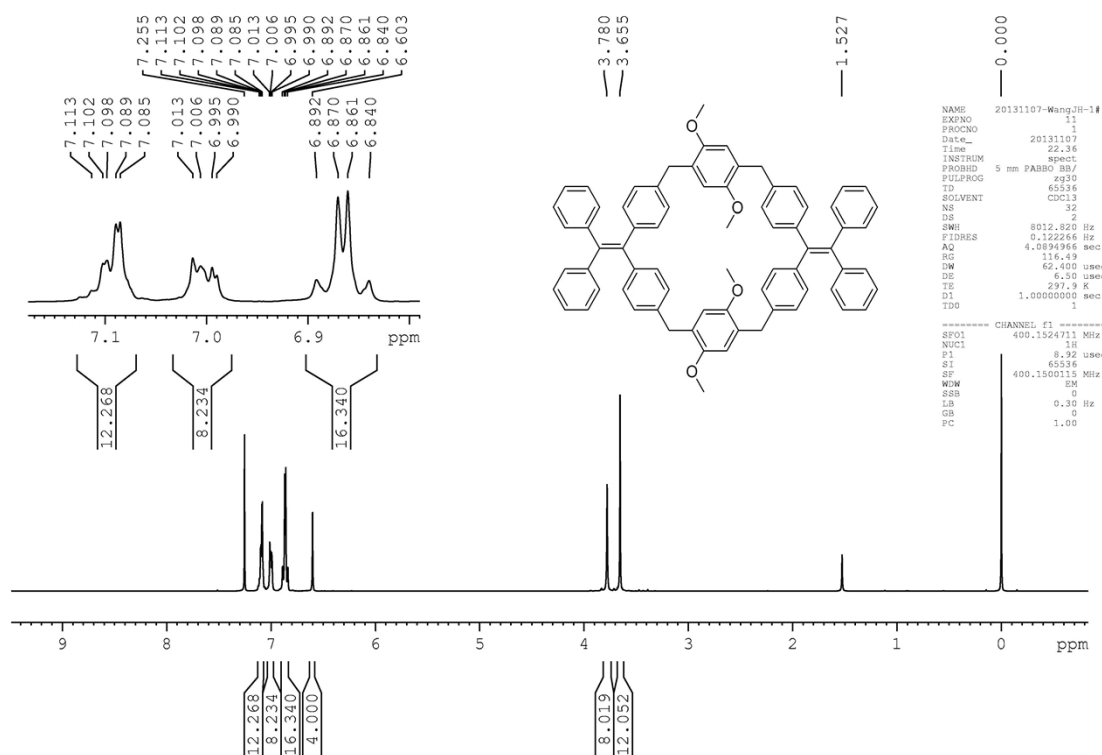

**Fig. S1.** <sup>1</sup>H NMR spectrum of **3a** in CDCl<sub>3</sub>.

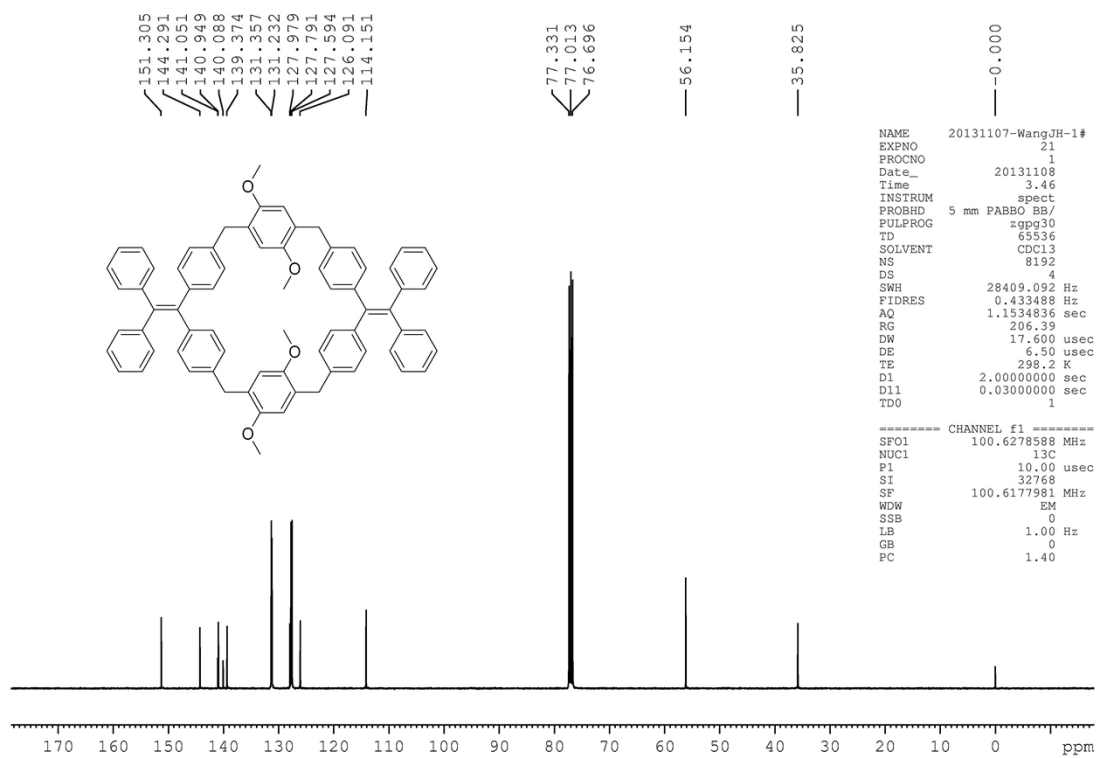

Fig. S2.  $^{13}\text{C}$  NMR spectrum of **3a** in  $\text{CDCl}_3$ .

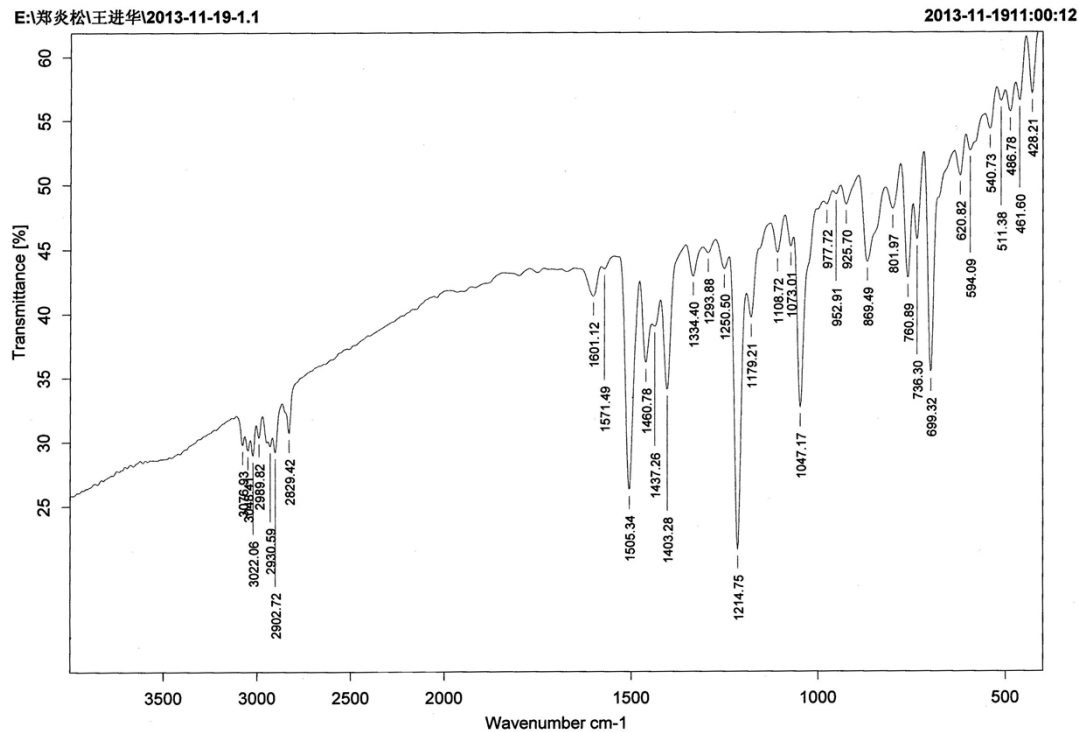

Fig. S3. IR spectrum of **3a**.

## Mass Spectrum List Report

|                                                        |                                         |
|--------------------------------------------------------|-----------------------------------------|
| <b>Analysis Info</b>                                   | Acquisition Date 11/18/2013 11:04:16 AM |
| Analysis Name D:\Data\ZhengYS\zheng-wangjh20131118-2.d | Operator BDAL@DE                        |
| Method tune_low.m                                      | Instrument / Ser# micrOTOF 10401        |
| Sample Name zheng-wangjh20131118-2                     |                                         |
| Comment                                                |                                         |

|                              |            |                      |          |                  |           |
|------------------------------|------------|----------------------|----------|------------------|-----------|
| <b>Acquisition Parameter</b> |            |                      |          |                  |           |
| Source Type                  | ESI        | Ion Polarity         | Positive | Set Nebulizer    | 0.2 Bar   |
| Focus                        | Not active |                      |          | Set Dry Heater   | 250 °C    |
| Scan Begin                   | 50 m/z     | Set Capillary        | 4500 V   | Set Dry Gas      | 4.0 l/min |
| Scan End                     | 3000 m/z   | Set End Plate Offset | -500 V   | Set Divert Valve | Waste     |

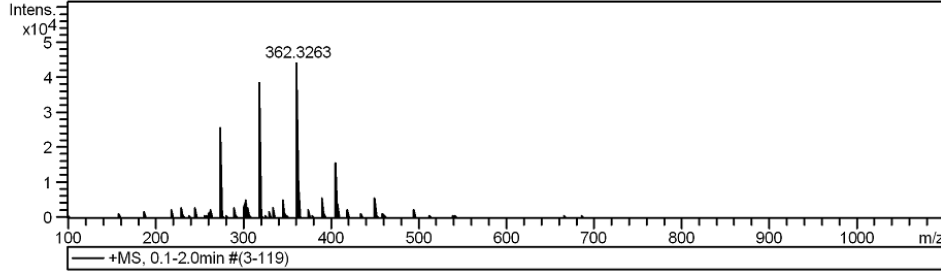

| # | m/z      | Res. | S/N    | I     | FWHM   |
|---|----------|------|--------|-------|--------|
| 1 | 274.2741 | 5373 | 2830.6 | 25528 | 0.0511 |
| 2 | 318.3003 | 5514 | 3415.0 | 38490 | 0.0577 |
| 3 | 362.3263 | 5677 | 3744.1 | 44356 | 0.0638 |
| 4 | 406.3523 | 5753 | 1502.0 | 15966 | 0.0706 |
| 5 | 406.3523 | 5753 | 1502.0 | 15966 | 0.0706 |
| 6 | 450.3785 | 5893 | 593.1  | 5583  | 0.0764 |
| 7 | 494.4041 | 6150 | 279.1  | 2287  | 0.0804 |
| 8 | 988.4496 | 6535 | 76.0   | 189   | 0.1513 |

**Fig. S4.** ESI<sup>+</sup>-HRMS spectrum of **3a**.

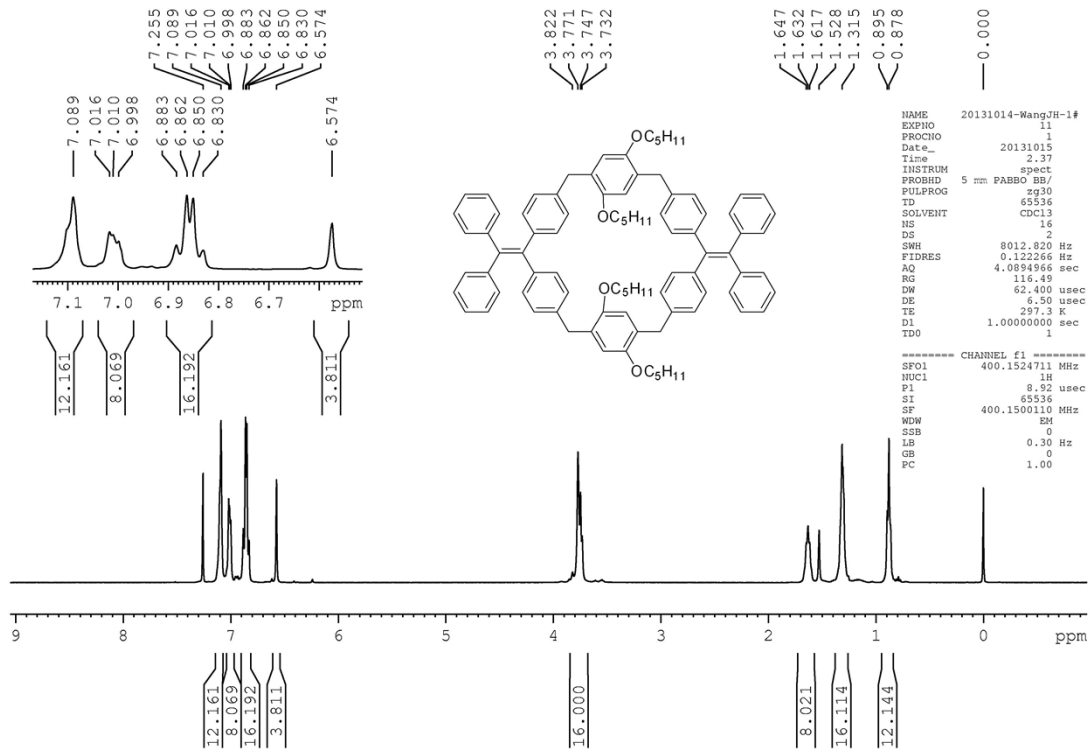

**Fig. S5.** <sup>1</sup>H NMR spectrum of **3b** in CDCl<sub>3</sub>.

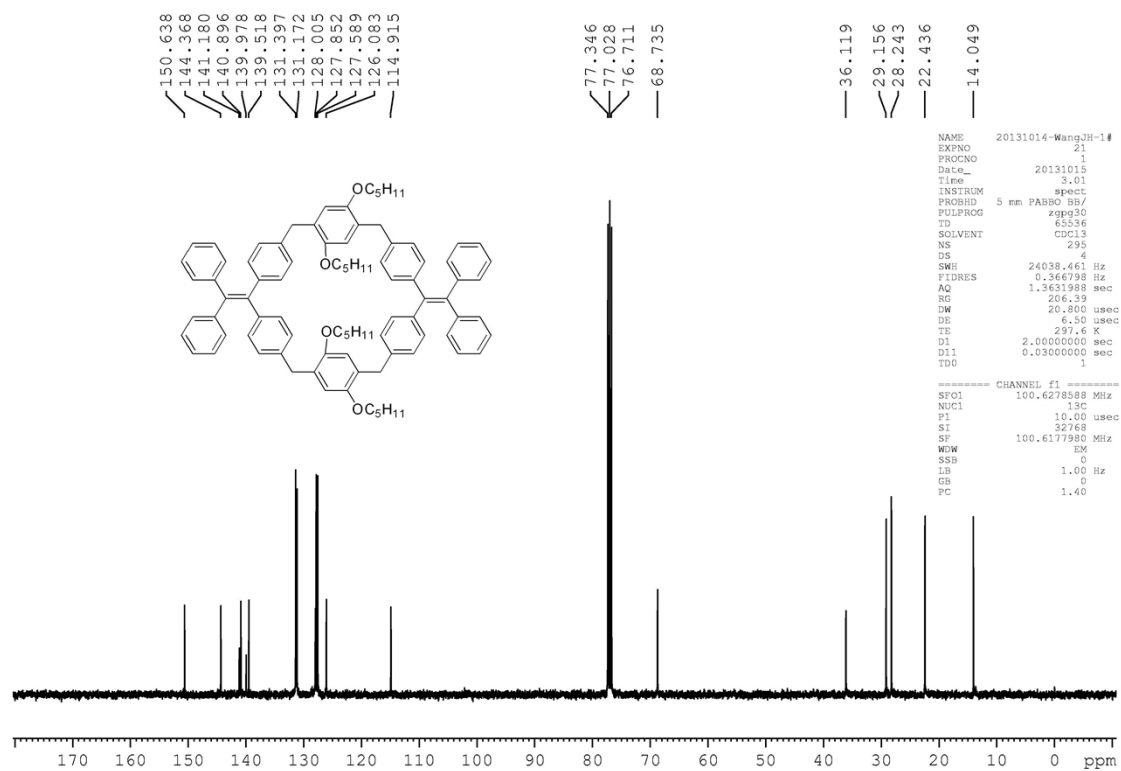

Fig. S6. <sup>13</sup>C NMR spectrum of **3b** in CDCl<sub>3</sub>.

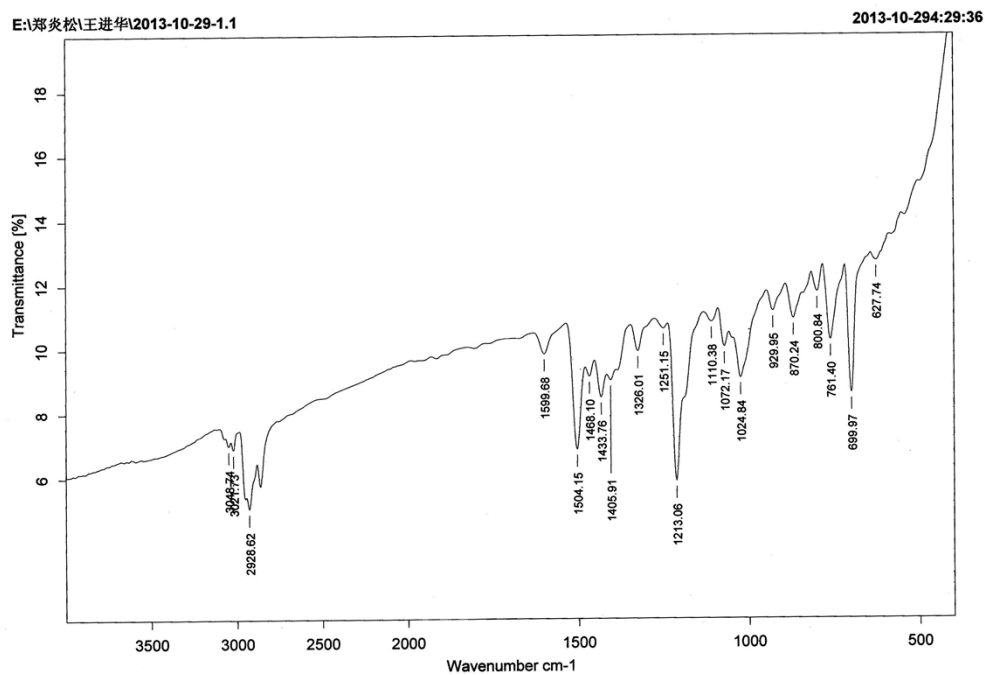

Fig. S7. IR spectrum of **3b**.



## Mass Spectrum List Report

|                      |                                  |                   |                       |
|----------------------|----------------------------------|-------------------|-----------------------|
| <b>Analysis Info</b> |                                  | Acquisition Date  | 10/15/2013 4:13:59 PM |
| Analysis Name        | D:\Data\ZhengYS\wang20131015-1.d | Operator          | BDAL@DE               |
| Method               | tune_wide.m                      | Instrument / Ser# | micrOTOF 10401        |
| Sample Name          | wang20131015-1                   |                   |                       |
| Comment              |                                  |                   |                       |

### Acquisition Parameter

|             |          |                      |          |                  |           |
|-------------|----------|----------------------|----------|------------------|-----------|
| Source Type | ESI      | Ion Polarity         | Positive | Set Nebulizer    | 0.4 Bar   |
| Focus       | Active   |                      |          | Set Dry Heater   | 180 °C    |
| Scan Begin  | 50 m/z   | Set Capillary        | 4500 V   | Set Dry Gas      | 4.0 l/min |
| Scan End    | 3000 m/z | Set End Plate Offset | -500 V   | Set Divert Valve | Waste     |

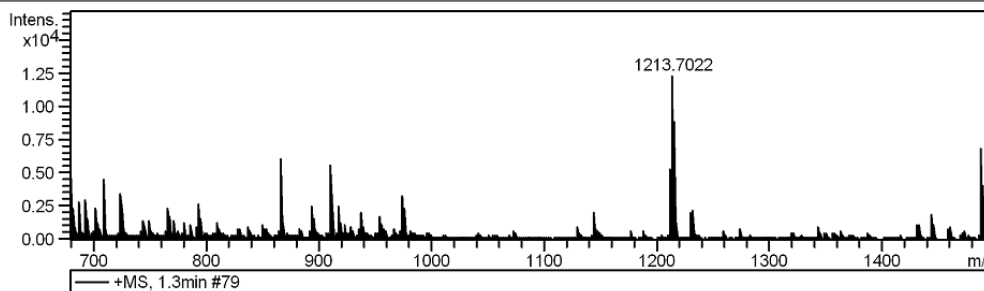

| # | m/z       | Res.  | S/N    | I      | FWHM   |
|---|-----------|-------|--------|--------|--------|
| 1 | 318.2998  | 12876 | 1584.7 | 351640 | 0.0247 |
| 2 | 651.4295  | 13891 | 1135.4 | 293799 | 0.0469 |
| 3 | 1213.7022 | 13317 | 117.6  | 12340  | 0.0911 |

**Fig. S8.** ESI<sup>+</sup>-HRMS spectrum of **3b**.

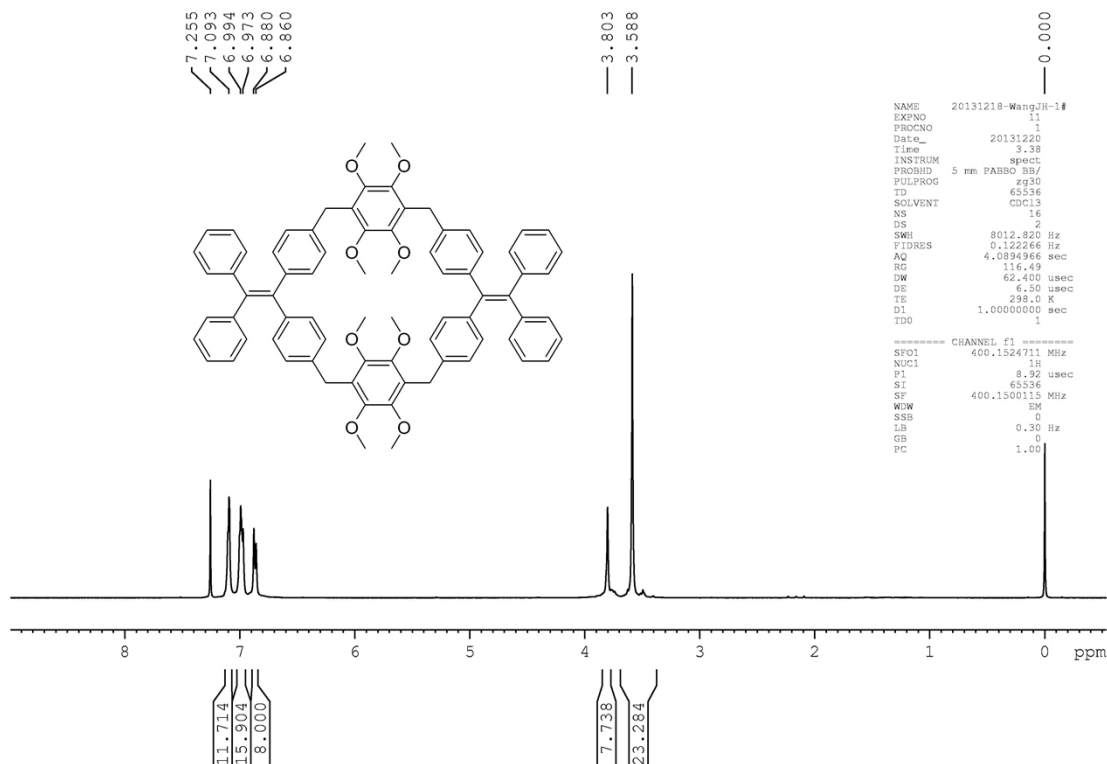

**Fig. S9.** <sup>1</sup>H NMR spectrum of **3c** in CDCl<sub>3</sub>.

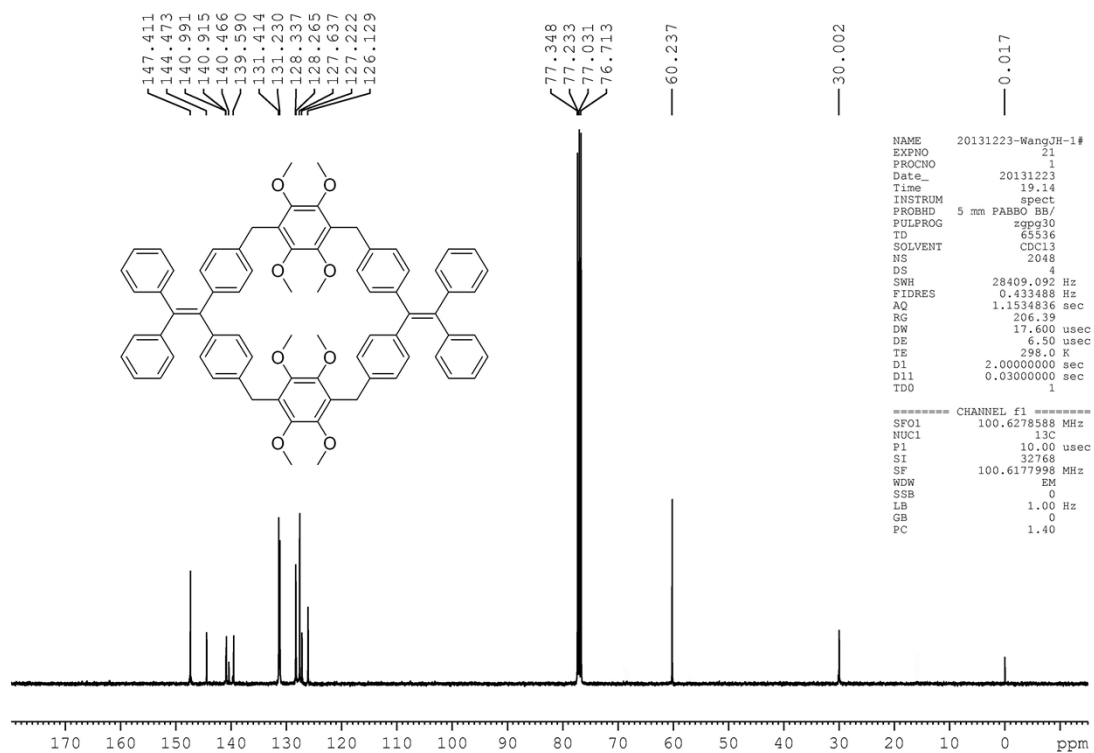

Fig. S10.  $^{13}\text{C}$  NMR spectrum of **3c** in  $\text{CDCl}_3$ .

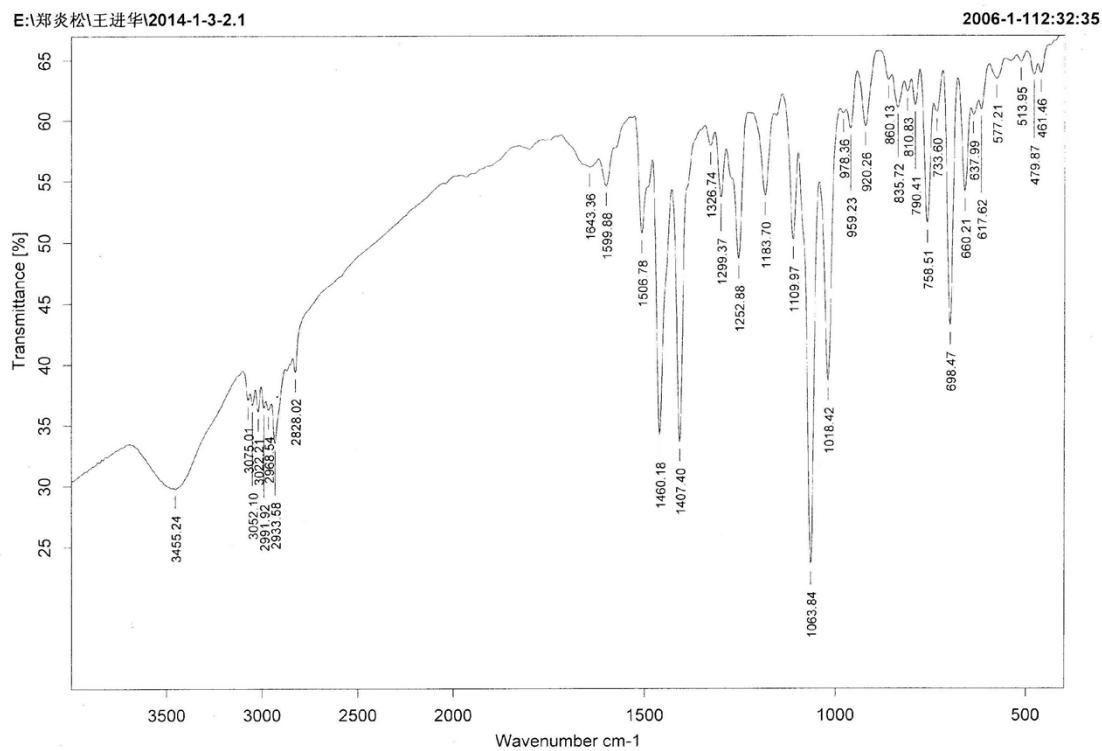

Fig. S11. IR spectrum of **3c**.

## Mass Spectrum List Report

|                      |                                           |                   |                      |       |
|----------------------|-------------------------------------------|-------------------|----------------------|-------|
| <b>Analysis Info</b> |                                           | Acquisition Date  | 1/14/2014 3:29:17 PM |       |
| Analysis Name        | D:\Data\ZhengYS\zheng-wang-20140114-2-3.d | Operator          | BDAL@DE              |       |
| Method               | tune_wide.m                               | Instrument / Ser# | micrOTOF             | 10401 |
| Sample Name          | zheng-wang-20140114-2-3                   |                   |                      |       |
| Comment              |                                           |                   |                      |       |

|                              |          |                      |          |                  |           |
|------------------------------|----------|----------------------|----------|------------------|-----------|
| <b>Acquisition Parameter</b> |          |                      |          |                  |           |
| Source Type                  | ESI      | Ion Polarity         | Positive | Set Nebulizer    | 0.4 Bar   |
| Focus                        | Active   |                      |          | Set Dry Heater   | 180 °C    |
| Scan Begin                   | 50 m/z   | Set Capillary        | 4500 V   | Set Dry Gas      | 4.0 l/min |
| Scan End                     | 3000 m/z | Set End Plate Offset | -500 V   | Set Divert Valve | Waste     |

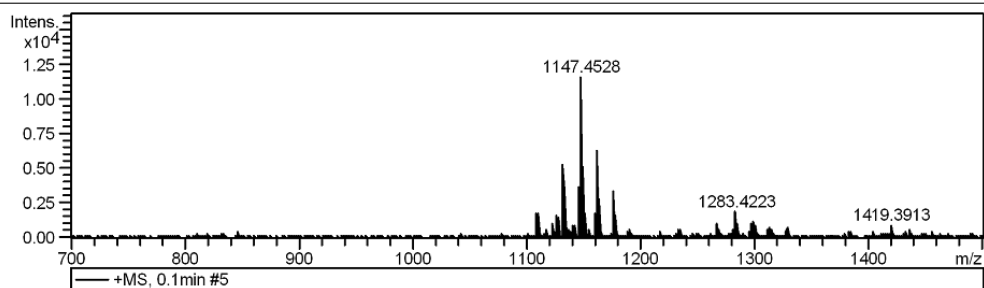

| # | m/z       | Res.  | S/N  | I     | FWHM   |
|---|-----------|-------|------|-------|--------|
| 1 | 1109.4919 | 12735 | 5.2  | 1876  | 0.0871 |
| 2 | 1131.4786 | 10524 | 13.8 | 5276  | 0.1075 |
| 3 | 1147.4528 | 10526 | 31.2 | 11620 | 0.1090 |
| 4 | 1161.4713 | 11682 | 17.3 | 6324  | 0.0994 |
| 5 | 1175.4823 | 11379 | 9.7  | 3482  | 0.1033 |
| 6 | 1283.4223 | 12390 | 6.3  | 1894  | 0.1036 |
| 7 | 1419.3913 | 36885 | 3.8  | 960   | 0.0385 |

**Fig. S12.** ESI<sup>+</sup>-HRMS spectrum of **3c**.

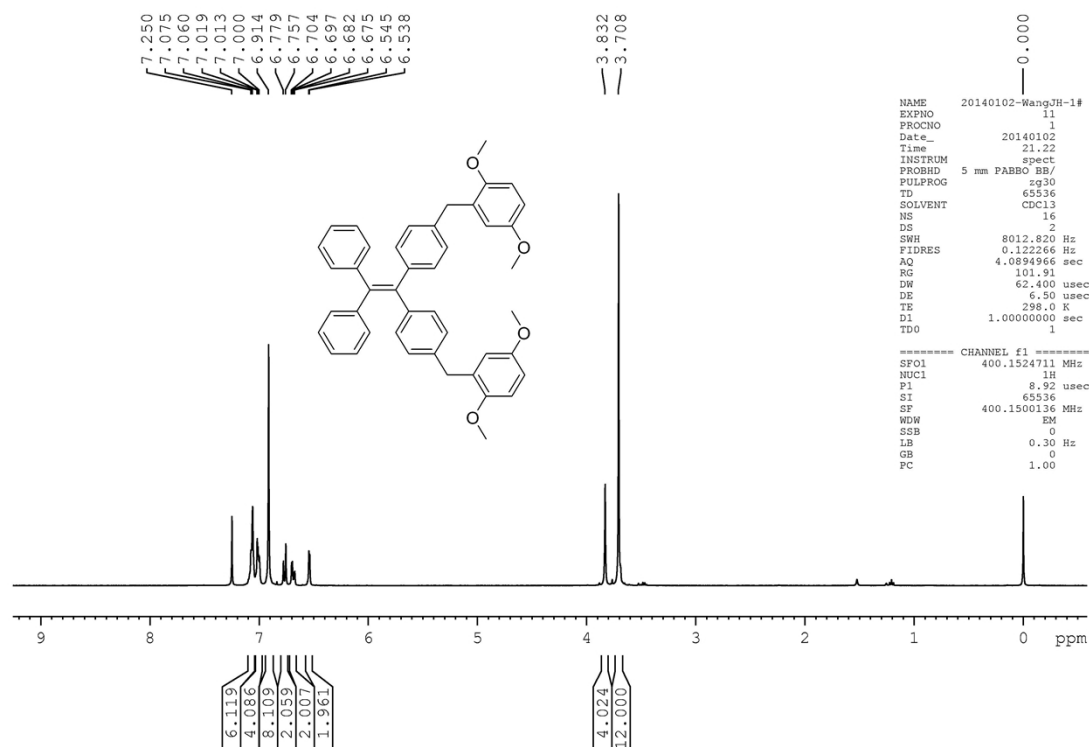

**Fig. S13.** <sup>1</sup>H NMR spectrum of **4** in CDCl<sub>3</sub>.

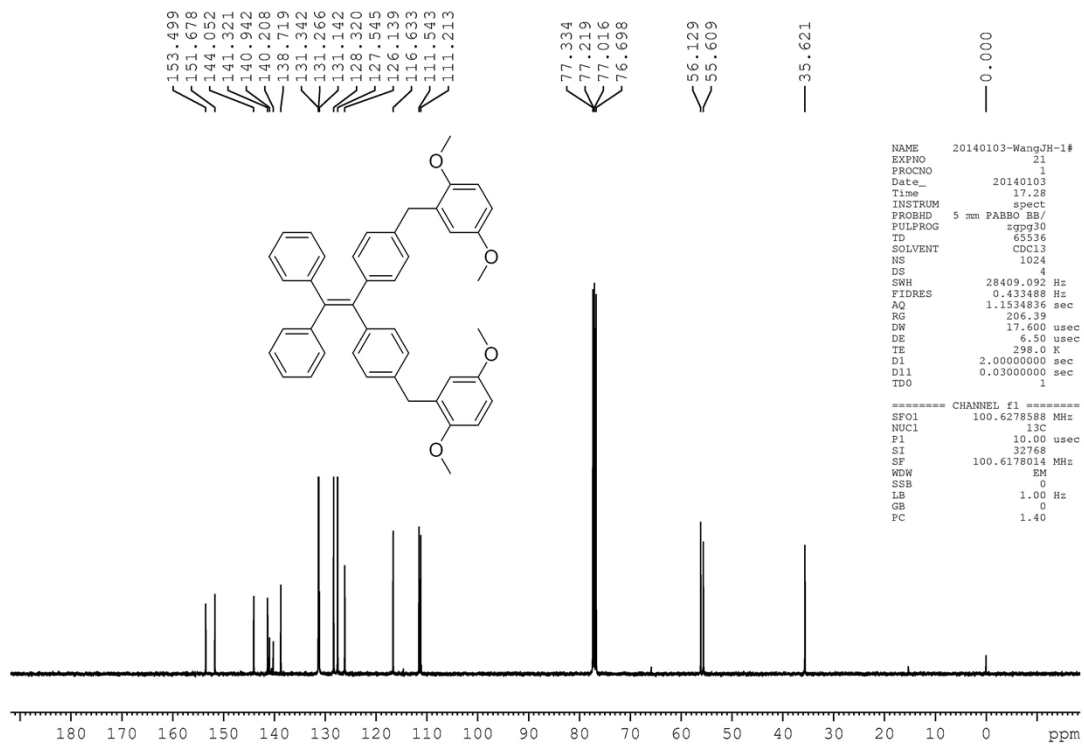

Fig. S15. <sup>13</sup>C NMR spectrum of 4 in CDCl<sub>3</sub>.

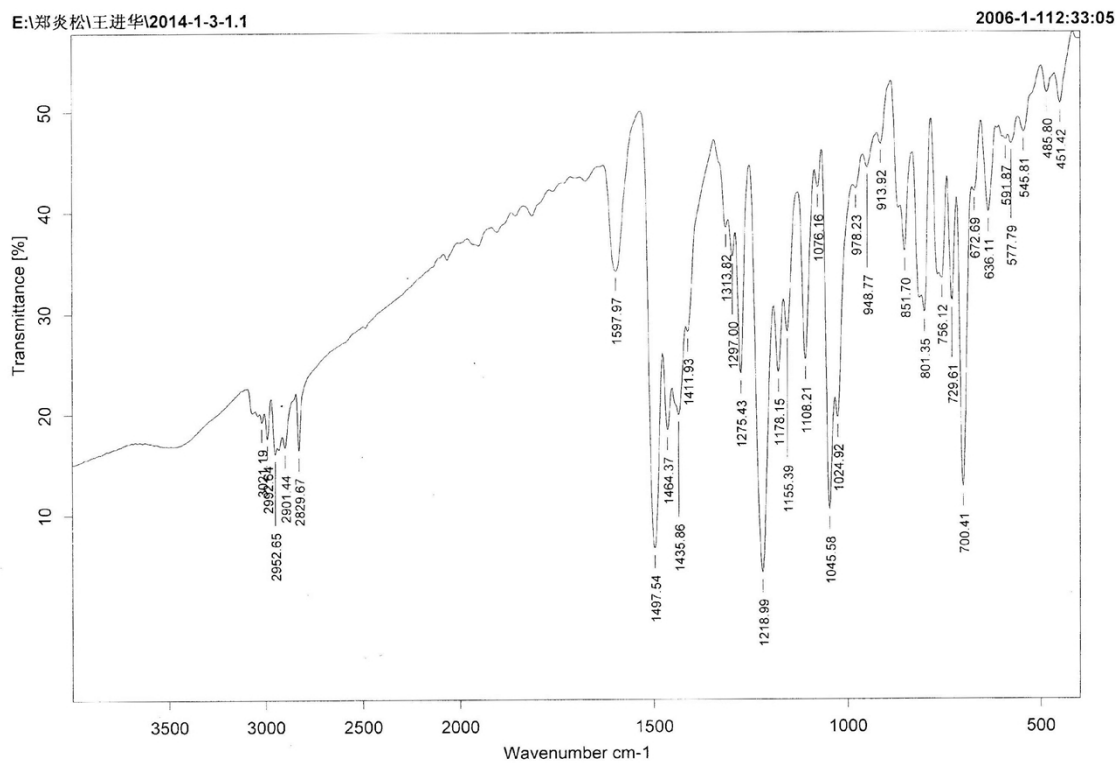

Fig. S15. IR spectrum of 4.

## Mass Spectrum List Report

**Analysis Info**  
Analysis Name D:\Data\ZhengYS\zheng-wang-20140114-1-2.d  
Method tune\_wide.m  
Sample Name zheng-wang-20140114-1-2  
Comment  
Acquisition Date 1/14/2014 3:21:41 PM  
Operator BDAL@DE  
Instrument / Ser# micrOTOF 10401

### Acquisition Parameter

Source Type ESI Ion Polarity Positive Set Nebulizer 0.4 Bar  
Focus Active Set Dry Heater 180 °C  
Scan Begin 50 m/z Set Capillary 4500 V Set Dry Gas 4.0 l/min  
Scan End 3000 m/z Set End Plate Offset -500 V Set Divert Valve Waste

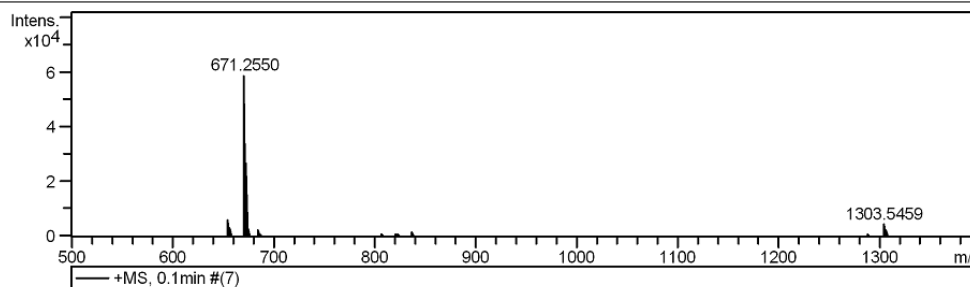

| # | m/z       | Res.  | S/N   | I     | FWHM   |
|---|-----------|-------|-------|-------|--------|
| 1 | 633.2956  | 16783 | 2.4   | 390   | 0.0377 |
| 2 | 655.2804  | 10388 | 36.7  | 6559  | 0.0631 |
| 3 | 671.2550  | 12507 | 312.3 | 58994 | 0.0537 |
| 4 | 1303.5459 | 10994 | 35.6  | 4560  | 0.1186 |

**Fig. S16.** ESI<sup>+</sup>-HRMS spectrum of **4**.

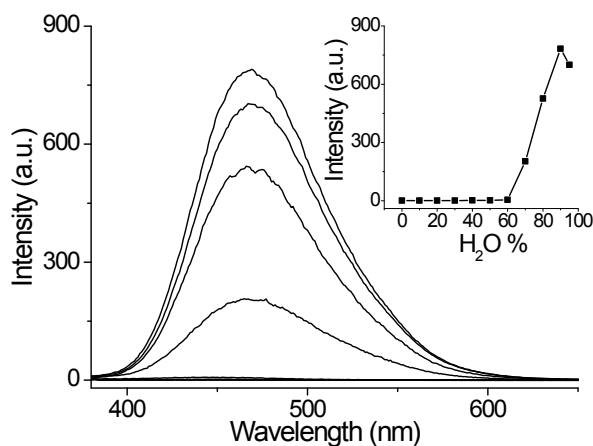

**Fig. S17.** Change of the fluorescence spectrum of **3a** ( $1.0 \times 10^{-5}$  M) in THF with water fraction. Inset, the curve of the fluorescence intensity at 472 nm vs. the water fraction in THF.  $\lambda_{\text{ex}} = 342$  nm, ex/em slit widths = 3/3 nm.

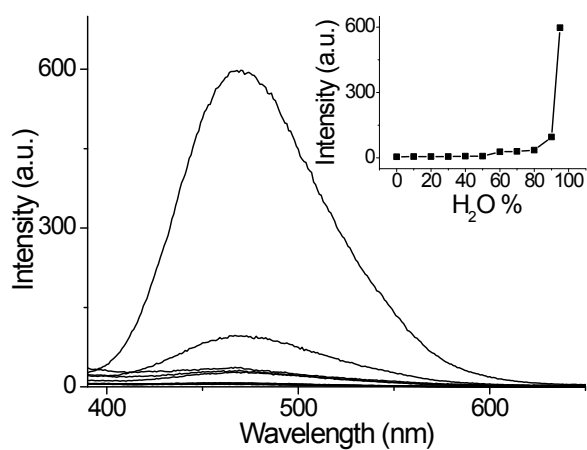

**Fig. S18.** Change of the fluorescence spectrum of **3b** ( $1.0 \times 10^{-5}$  M) in THF with water fraction. Inset, the curve of the fluorescence intensity at 472 nm vs. the water fraction in THF.  $\lambda_{\text{ex}} = 339$  nm, ex/em slit widths = 3/3 nm.

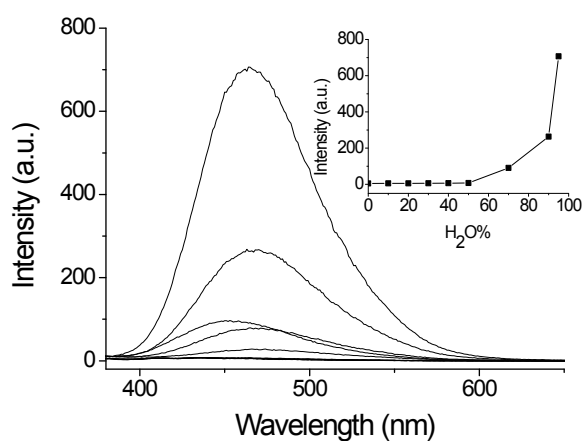

**Fig. S19.** Change of the fluorescence spectrum of **3c** ( $1.0 \times 10^{-5}$  M) in THF with water fraction. Inset, the curve of the fluorescence intensity at 464 nm vs. the water fraction in THF.  $\lambda_{\text{ex}} = 343$  nm, ex/em slit widths = 3/3 nm.

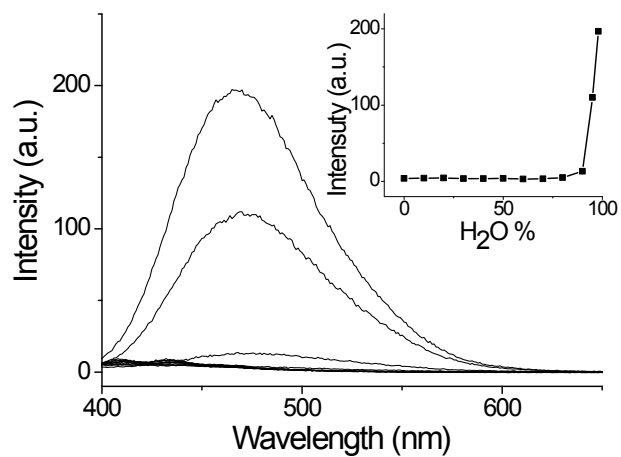

**Fig. S20.** Change of the fluorescence spectrum of **4** ( $1.0 \times 10^{-5}$  M) in THF with water fraction. Inset, the curve of the fluorescence intensity at 467 nm vs. the water fraction in THF.  $\lambda_{\text{ex}} = 339$  nm, ex/em slit widths = 3/3 nm.

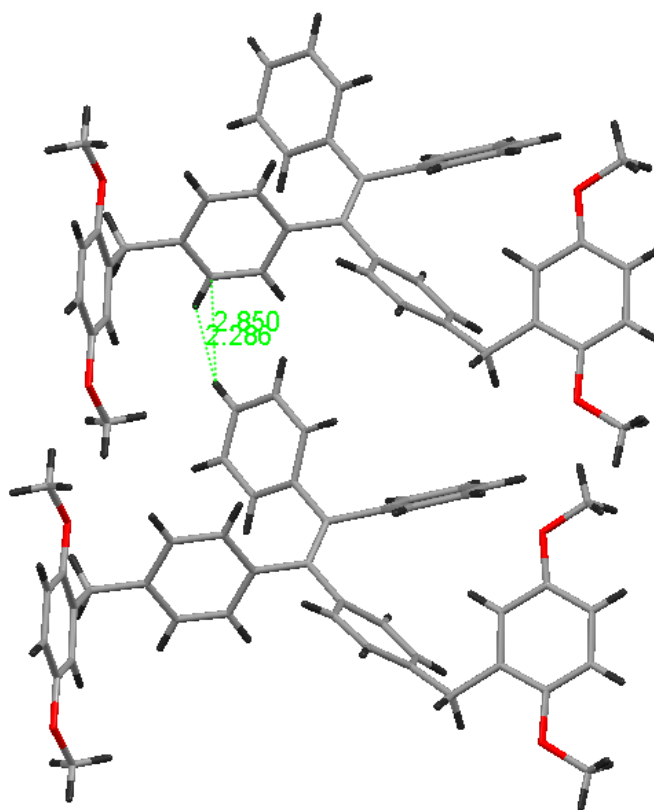

**Fig. S21.** Partial short contacts between molecules of **4**.
